# Supplementary material
Source: PubMed Central journal article supplement (PMC3129430)
Supplement: NIHMS290568-supplement-01.pdf [file NIHMS290568-supplement-01.pdf]

## **Supplemental data**

### **Susceptibility to amoxicillin-clavulanate-induced liver injury is influenced by multiple HLA class I and class II alleles**

M. Isabel Lucena, Mariam Molokhia, Yufeng Shen, Thomas J. Urban, Guruprasad P. Aithal, Raúl J. Andrade, Christopher P. Day, Francisco Ruiz-Cabello, Peter T. Donaldson, Camilla Stephens, Munir Pirmohamed, Manuel Romero-Gomez, Jose Maria Navarro, Robert J. Fontana, Michael Miller, Max Groome, Emmanuelle Bondon-Guitton, Anita Conforti, Bruno H. C. Stricker, Alfonso Carvajal, Luisa Ibanez, Qun-Ying Yue, Michel Eichelbaum, Aris Floratos, Itsik Pe'er, Mark J. Daly, David B. Goldstein, John F. Dillon, Matthew R. Nelson, Paul B. Watkins, Ann K. Daly for the Spanish DILI Registry, EUDRAGENE, DILIN, DILIGEN and International SAEC

## **Appendix. Collaborators and Contributors to case recruitment**

### Members of the SAEC scientific management committee

Arthur L Holden [SAEC], Brian Spear [Abbott], Anahita Bhatena, PhD [Abbott], Joe Walker [Daiichi-Sankyo], Lon Cardon [GlaxoSmithKline], Matt Nelson [GlaxoSmithKline], Nadine Cohen [Johnson & Johnson], Joanne Meyer [Novartis], Steve Lewitzky [Novartis], Sally John [Pfizer], Klaus Lindpaintner [Roche], Steven Kovacs [Sanofi-Aventis], Meng Zhang [Sanofi-Aventis], Leonardo Sahelijo [Takeda], Michael Dunn [Wellcome Trust], Maha Karnoub [Wyeth], and Michael E Burczynski [Wyeth]

### DILIGEN collaborators

Investigators: A.K. Daly (PI), C.P. Day, P.T. Donaldson, C. Donaldson (Newcastle University); G.P. Aithal (Nottingham Digestive Diseases Centre); M. Pirmohamed, B.K. Park, S. Khoo, I. Gilmore (University of Liverpool); W. Bernal (Kings College Hospital, London). Research nurses: J. Henderson (Newcastle University); C Davies (Nottingham Digestive Diseases Centre); K. Hawkins, A. Hanson, J. Evely (University of Liverpool). Other contributors to case recruitment: H. Hussaini (Truro), P. Mills (Glasgow), W. Griffiths (Addenbrooks Hospital, Cambridge), J. Collier (John Radcliffe Infirmary, Oxford), A. Brind (North Staffordshire), N. Fisher (Dudley), J. Shearman (South Warwick), E. Elias (Birmingham), A. Grant (Leicester Royal Infirmary), A. Austin (Derby), F. Gordon (Bristol), M. Cramp (Plymouth), S. Saksena (North Durham), H J McMurtry (Chorley).

### DILIN collaborators

Paul Watkins (University of North Carolina- Chapel Hill), Robert Fontana (University of Michigan), Naga Chalasani (Indiana University), Herb Bonkovsky (University of Connecticut), Timothy Davern (University of California- San Francisco), James Rochon (Duke Clinical Research Institute), Jay Hoofnagle, Jose Serrano (Senior Project officers, National Institutes of Health).

### EUDRAGENE collaborators

Investigators: Mariam Molokhia (Joint PI), LSHTM, UK, Paul McKeigue (Joint PI), University of Edinburgh, Scotland, Data Analysis Committee: Bruno Stricker, Erasmus MC, NL, Qun-Ying Yue, Medical Products Agency, Uppsala, Sweden. Centre investigators: Alfonso Carvajal, Universidad de Valladolid, Spain, Luisa Ibáñez, Fundació Institut Català de Farmacologia; Hospital Universitari Vall d' Hebron, Universitat Autònoma, Barcelona, Spain, Maryse Lapeyre-Mestre, Université de Toulouse, France, Jean-Louis Montastruc, Université de Toulouse, France, Dr. Anita Conforti, University Hospital, Verona, Italy, Giampaolo Velo, University Hospital, Verona, Italy, Michel Eichelbaum, Dr. Margarete Fischer-Bosch Institute Clinical Pharmacology, Stuttgart.

Contributors to case recruitment/other: Emmanuelle Bondon-Guitton, Université de Toulouse, France, Inés Salado, Universidad de Valladolid, Spain, Lourdes Vendrell, Fundació Institut Català de Farmacologia, Barcelona, Spain, Francesca Succurro, University Hospital, Verona, Italy, Marco Smerghetto, University Hospital, Verona, Italy, Mark Eijgelsheim, Erasmus MC, NL, Ramazan Buyukcelik, Erasmus MC, NL, Pascal Arp, Erasmus MC, NL, Richard Jackson, LSHTM, UK, Ferran Orsola, LSHTM, UK. Pharmacovigilance centres involved in case ascertainment (France, Spain, Italy): L'Association Française des Centres Régionaux de Pharmacovigilance (CRPV), Sistema Español de Farmacovigilancia. Agencia Española de Medicamentos y Productos Sanitarios, Italian Pharmacovigilance Centres of Veneto Region.

### Spanish DILI Registry collaborators

Investigators: R.J. Andrade (PI), M.I. Lucena, C. Stephens, E. Ulzurrun, Y. Borraz (Málaga University), F. Ruiz-Cabello, M.A. Lopez-Nevot (H. Virgen de las Nieves, Granada). Contributors to case recruitment: M. Robles-Diaz, M. García-Cortés, I. Moreno (H. Virgen de la Victoria, Málaga), M. Romero-Gomez, A. Madrazo, R. Corpas, E. Suárez (H. Valme, Sevilla), M.C. Fernández, G. Peláez, M. Casado, J.L. Vega, F. Suárez, M. González-Sánchez (H. Torrecárdenas, Almería), J.M. Navarro, (H. Costa del Sol, Málaga), C. Guarner, G. Soriano, E.M. Roman (H. San Pau, Barcelona), R. Planas, J.

Costa, A. Barriocanal, F.García-Góngora (H. German Trias i Pujol, Badalona), T. Muñoz-Yague, J.A. Solís-Herruzo (H. 12 de Octubre, Madrid), R. Pérez-Álvarez (H. Central de Asturias, Oviedo), A. Castiella, E.M. Zapata (H. de Mendaro, Guipuzcuo), F. Pons (H. Marqués de Valdecilla, Santander), M. Jiménez, R. González-Grande (H. Carlos Haya, Málaga), M. Moreno (H. la Laguna, Tenerife), J.L. Calleja, J. de la Revilla (H. Puerta de Hierro, Madrid), J. Salmeron, A. Gila (H. Universitario San Cecilio), R. Solá (H. del Mar, Barcelona), O. Lo Lacono (H. del Tajo, Madrid), E. Martín (H. La Línea, Cadiz), J.A. Durán, I. Carmona, A. Melcón de Dios, M. Jiménez-Sáez, J. Alanis-López, M. Villar (H. Virgen de la Macarena, Sevilla)

## Supplemental Materials and Methods

### Genome-wide association study QC

QC was conducted at both single marker and subject levels. Any marker that did not pass the following criteria was excluded from analysis: (i) genotype call rate in the batch of subjects greater than 95%, (ii) minor allele frequency greater than 1%, (iii) p-value for Hardy-Weinberg equilibrium greater than  $10^{-7}$  in controls (if applicable). After applying these criteria, 249,893 markers (including SNPs and CNV probes) were discarded and 822,927 SNPs were left for downstream analysis.

Any subject that did not pass the following criteria was excluded from analysis: (i) missing genotype rate  $< 0.1$  among the SNPs that passed QC; (ii) not a sample duplicate or closely related based on estimated identity-by-descent (IBD) using PLINK v 1.05.<sup>22</sup> In total, 10 cases were discarded on this basis.

### HLA genotyping

Typing was performed by sequencing PCR products for exons 2 and 3 for *HLA-A* and *B* and exon 2 for *DRB1*, *DQA1* and *DQB1* on both strands using cycle sequencing with BigDye V3.1 (Applied Biosystems, Foster City, CA) chemistry. For *HLA-A* and *B*, typing, generic PCR amplifications were carried out for each locus.<sup>1</sup> *HLA-A* had additional group-specific amplifications using an A2-specific site in intron 1. The A2-group contains the most common alleles among the *HLA-A* alleles and this additional allele sequencing separated A2-carrying heterozygotes and reduced ambiguous allele combinations. For *HLA-B*, six subgroup amplifications, TA, CG (Di-allelic sites in intron 1)<sup>2</sup>, B7, B15, B13, and Bw4 groups, were performed.

HLA class II sequencing was carried out on amplicons produced by group-specific amplifications. A total of 17 gene- and group-specific *DRB1* amplifications were performed using exon-based

amplification primers: *DRB1\*01*, *DRB1\*15/16*, *DRB1\*03/11/13/14*, *DRB1\*03/11/13/14-86V*,  
*DRB1\*11*, *DRB1\*04*, *DRB1\*04-86V*, *DRB1\*07*, *DRB1\*08/12*, *DRB1\*09*, *DRB1\*10*.

In addition to exon-based group-specific sequencing, intron based group-specific sequencing was used for *DRB1\*01-In*, *DRB1\*15-In*, *DRB1\*03/11/13/14-In*, *DRB1\*04-In*, *DRB1\*08-In*, and *DRB1\*10-In*. These newly added intron-based amplifications not only improved the resolution but also the accuracy of the typing by capturing variations at the beginning of exon 2 sequences which were missing in the exon-based group-specific amplicons. Sorting *DRB1* sub-groups was accomplished by *DRB* generic typing. *DRB* generic typing was carried out by a hybridization-based sequence-specific oligonucleotide probe (SSO) method using AP-conjugated oligo probes. These SSO results were used for sorting *DRB1* subgroups and also for quality assurance purposes.

*DQA1* high resolution typing was achieved by sequencing amplicons generated by *DQA1* generic PCR products. *DQB1* high resolution typing was achieved by sequencing amplicons generated by *DQB1* generic, and three other *DQB1* subgroups. Sequencing data files were analyzed using Histogenetics' proprietary analysis programs Histomatcher and HistoMagic for HLA typing assignment of each sample. Allele assignments are based on IMGT/HLA Database release version 2.21.0 and Release date April 2008 (<http://www.ebi.ac.uk/imgt/hla/>).

## References

1. Cereb N, Maye P, Lee S, Kong Y, Yang SY. Locus-specific amplification of HLA class I genes from genomic DNA: locus-specific sequences in the first and third introns of HLA-A, -B, and -C alleles. *Tissue Antigens* 1995;45:1-11.
2. Cereb N, Yang SY. Dimorphic primers derived from intron 1 for use in the molecular typing of HLA-B alleles. *Tissue Antigens* 1997;50:74-6.

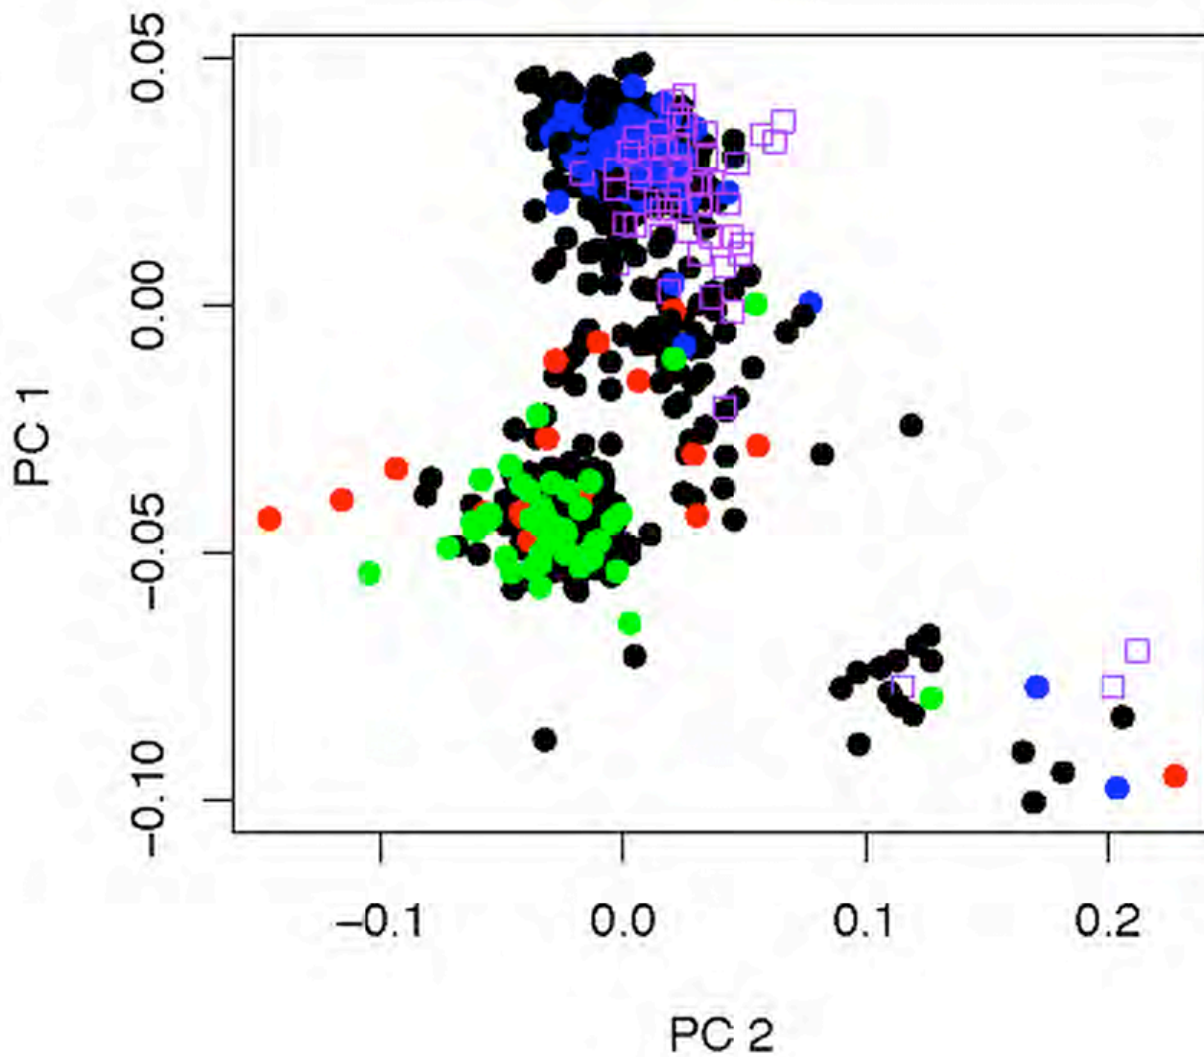

**Figure S1. Population structure of the cases and genetically-matched controls.** Principal component analysis plot for 201 cases and their 532 genetically matched controls. Blue dots: UK cases; Purple squares: DILIN cases; Green dots: Malaga; Red dots: Eudragene; Black: POPRES controls

(a)

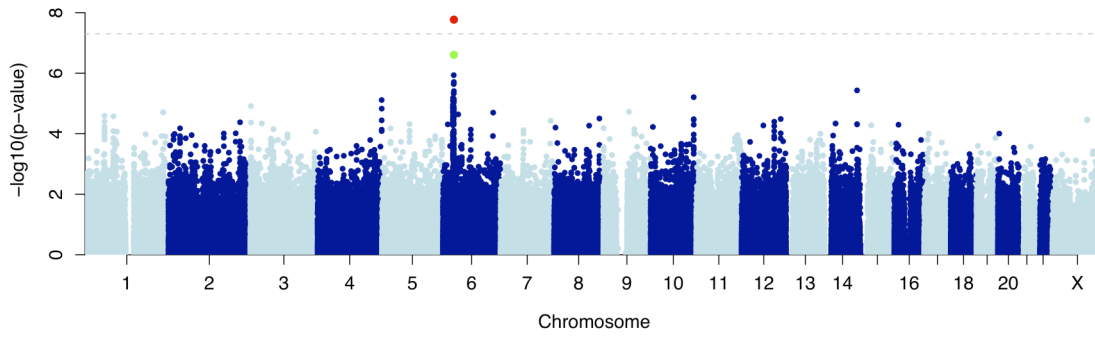

(b)

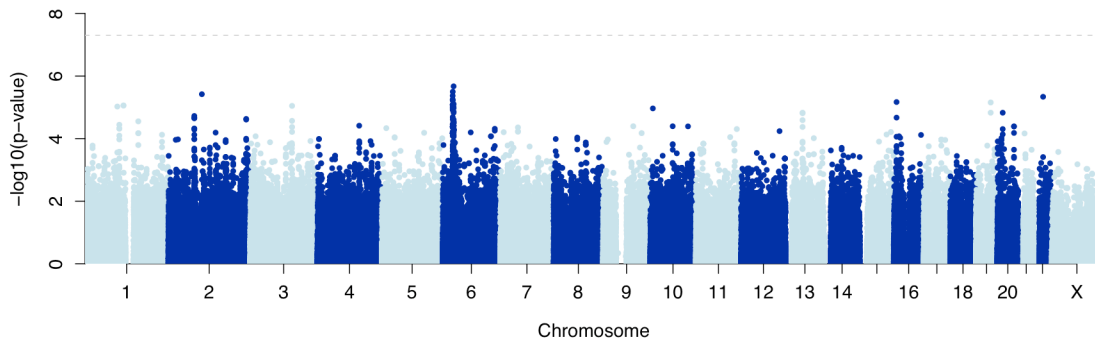

(c)

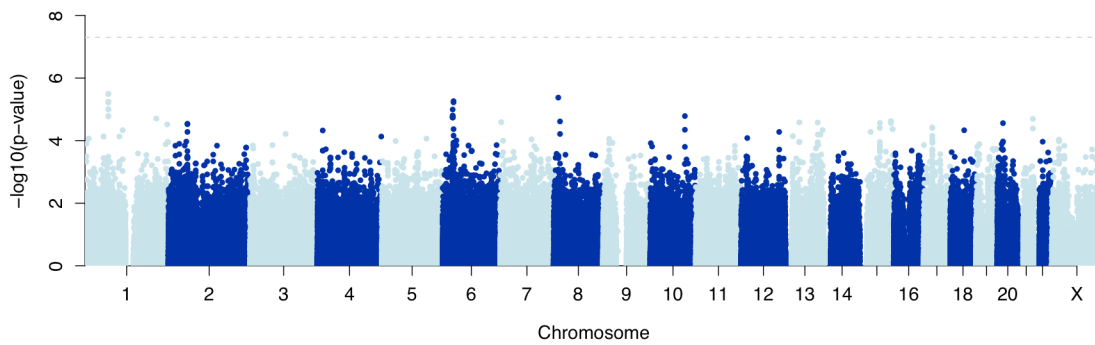

**Figure S2. Manhattan plots for the three groups separately.** (a) UK cases (n=74) versus Northwestern European controls (n=306) (b) DILIN cases (n=51) versus Northwestern European controls (n=306) (c) Spanish DILI Registry cases (n=46) versus Spanish controls (n=160)



A.

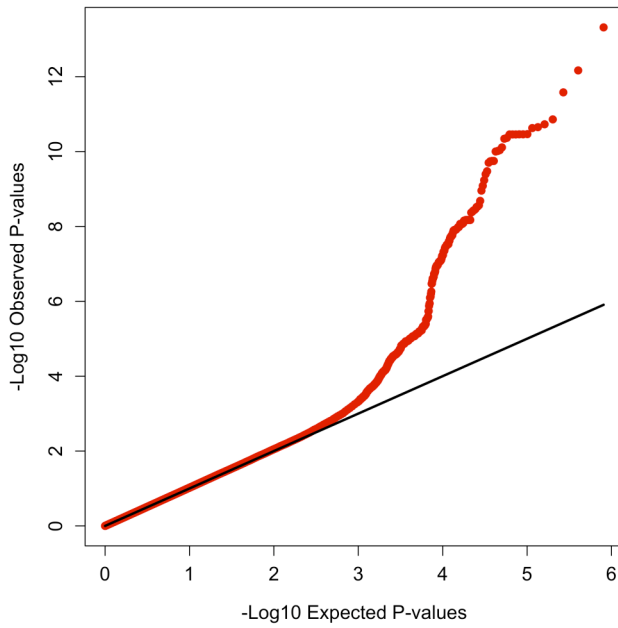

B.

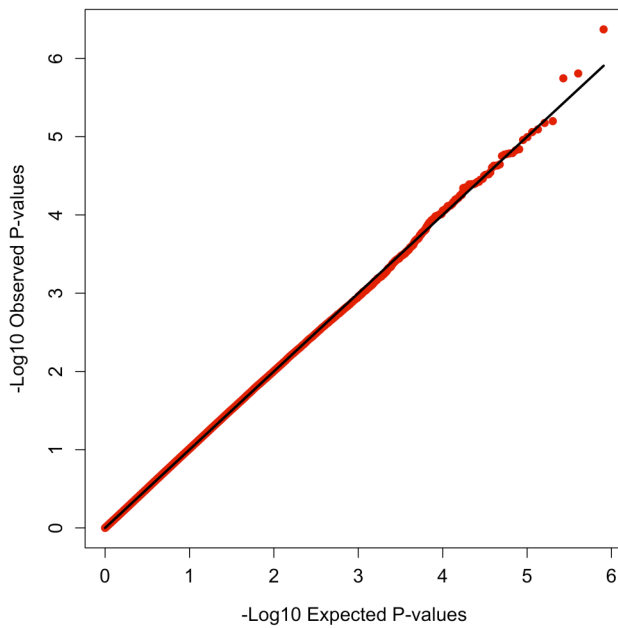

**Figure S3 Quantile-quantile plot of p-values from case-control analyses.** A. The comparison of empirical p-value quantiles from the genome-wide analysis to the expected quantiles under the uniform distribution (null hypothesis). The black solid line represents the null model where observed p-values

match the expected values. The red dots represent observed p-values versus the expected values. B The same as in A, after conditioning on the top class I and II SNPs as in Figure 1D.

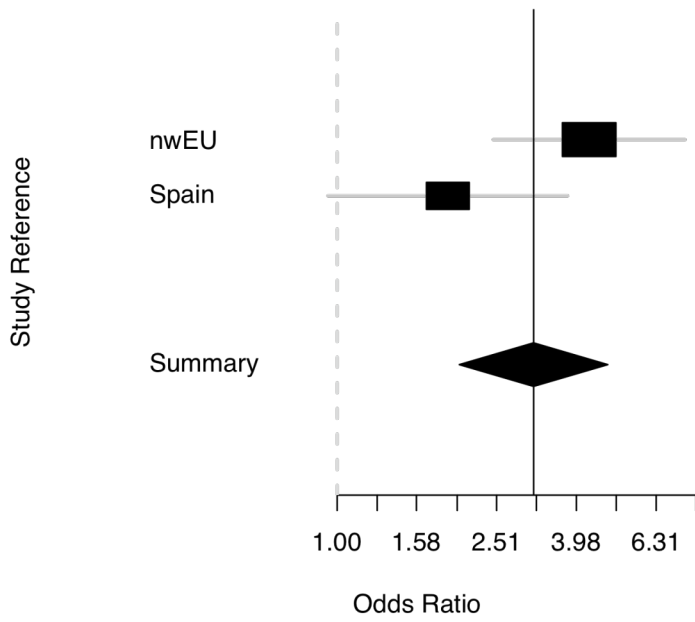

$p = 0.071$ .

**Figure S4.** Test of heterogeneity on *A\*0201* between Northwestern European and Spanish subjects.

**Table S1. Comparison of clinical characteristics between cohorts**

| Clinical characteristics | Test              | UK      | EUDRAGENE | Spanish DILI Registry | DILIN                | Note                                                  |
|--------------------------|-------------------|---------|-----------|-----------------------|----------------------|-------------------------------------------------------|
| Gender                   | Fisher's exact    | 0.24    | 1         | 0.87                  | 0.16                 |                                                       |
| Age                      | Two sample t-test | 0.75    | 0.054     | 0.66                  | 0.24                 |                                                       |
| Total days on drug       | Two sample t-test | 0.0035  | 0.042     | 0.19                  | 0.021                | UK vs DILIN: 0.0028                                   |
| Time to onset            | Two sample t-test | 0.00065 | 0.0042    | 0.016                 | 1.6x10 <sup>-8</sup> | DILIN vs UK: 8.7x10 <sup>-8</sup>                     |
| Pattern of injury        | Chi-square        | 0.20    | 0.20      | 0.22                  | 0.20                 | Combining cholestatic and mixed yields similar result |
| Causality (CIOMS)        | Two sample t-test | 0.08    | 0.94      | 0.19                  | 0.00091              | DILIN contains more probable cases                    |
| Peak Bilirubin           | Two sample t-test | 0.34    | 0.29      | 0.46                  | 0.017                | In log scale                                          |
| Peak ALT                 | Two sample t-test | 0.60    | 0.26      | 0.70                  | 0.45                 | In log scale                                          |
| Peak ALP                 | Two sample t-test | 0.31    | 0.59      | 0.14                  | 0.79                 | In log scale                                          |

Each cell is the p-value from cohort vs all other cohorts.

**Table S2. Top SNPs among reported GWAS hits of autoimmune diseases**

| Top SNPs              | Overall              |                 | UK (74 cases vs 306 controls) |               | US (51 cases vs 306 controls) |               | Spain (46 cases vs 160 controls) |                  | MAF in nwEU    | MAF in Spanish  |
|-----------------------|----------------------|-----------------|-------------------------------|---------------|-------------------------------|---------------|----------------------------------|------------------|----------------|-----------------|
|                       | p-value              | OR (95% CI)     | p-value                       | OR (95% CI)   | p-value                       | OR (95% CI)   | p-value                          | OR (95% CI)      |                |                 |
| rs2476601 (chr: 1p13) | 1.3x10 <sup>-4</sup> | 2.1 (1.5 – 3.2) | 0.025                         | 2.0 (1.1-3.6) | 8.7x10 <sup>-6</sup>          | 3.9 (2.2-7.0) | 0.48                             | 1.4 (0.50 - 3.4) | 0.16 vs. 0.065 | 0.087 vs. 0.063 |
| rs6679677 (chr: 1p13) | 2.3x10 <sup>-4</sup> | 2.1 (1.4 – 3.1) | 0.025                         | 2.0 (1.1-3.6) | 8.7x10 <sup>-6</sup>          | 3.9 (2.2-7.0) | 0.64                             | 1.2 (0.50 - 3.0) | 0.16 vs. 0.065 | 0.076 vs. 0.063 |

**Table S3. Pair-wise  $r^2$  between top SNPs and HLA alleles**

| allele 1                         | allele 2         | Northwestern European |          | Spanish |          |
|----------------------------------|------------------|-----------------------|----------|---------|----------|
|                                  |                  | cases                 | controls | cases   | controls |
| rs9274407/Minor                  | <i>DQB1*0602</i> | 0.8                   | 0.93     | 0.88    | 0.64     |
| rs9274407/Minor                  | rs3135388/T      | 0.76                  | 0.77     | 0.82    | 0.59     |
| rs9274407/Minor +<br>rs3135388/C | <i>DQB1*0402</i> | 0.89                  | 1        | 0.65    | 0.85     |
| rs3135388/T                      | <i>DQB1*0602</i> | 0.94                  | 1        | 0.88    | 0.9      |
| rs3135388/T                      | <i>DRB1*1501</i> | 0.98                  | 1        | 0.94    | 1        |
| rs2523822/C                      | <i>A*0201</i>    | 0.96                  | 0.91     | 0.64    | 0.87     |
| <i>DRB1*1501</i>                 | <i>DQB1*0602</i> | 0.91                  | 1        | 0.94    | 0.90     |

**Table S4. Frequencies of HLA alleles and haplotypes.**

HLA haplotypes inferred from unphased single gene alleles using Beagle

Five gene haplotype (Class I and Class II)

| Haplotype                                                   | count | Overall frequency | NW-EU Controls (n=107) |          |                   | NW-EU Cases (n=134) |          |                    | Spanish controls(n=121) |          |                  | Spanish cases (n=48) |          |                   |
|-------------------------------------------------------------|-------|-------------------|------------------------|----------|-------------------|---------------------|----------|--------------------|-------------------------|----------|------------------|----------------------|----------|-------------------|
|                                                             |       |                   | alleles                | carriers | freq (%carriers)  | alleles             | carriers | freq (%carriers)   | alleles                 | carriers | freq (%carriers) | alleles              | carriers | freq (%carriers)  |
| A*0101-<br>B*0801-<br>DRB1*0301-<br>DQA1*0501-<br>DQB1*0201 | 49    | 0.0598            | 18                     | 18       | 8.41%<br>(16.82%) | 20                  | 17       | 7.46%<br>(12.69%)  | 10                      | 10       | 4.13%<br>(8.26%) | 1                    | 1        | 1.04%<br>(2.08%)  |
| A*0201-<br>B*0702-<br>DRB1*1501-<br>DQA1*0102-<br>DQB1*0602 | 38    | 0.0463            | 2                      | 2        | 0.93%<br>(1.87%)  | 30                  | 30       | 11.19%<br>(22.39%) | 1                       | 1        | 0.41%<br>(0.83%) | 5                    | 5        | 5.21%<br>(10.42%) |
| A*0301-<br>B*0702-<br>DRB1*1501-<br>DQA1*0102-<br>DQB1*0602 | 22    | 0.0268            | 9                      | 8        | 4.21%<br>(7.48%)  | 6                   | 6        | 2.24%<br>(4.48%)   | 3                       | 3        | 1.24%<br>(2.48%) | 4                    | 4        | 4.17%<br>(8.33%)  |
| A*0201-<br>B*4402-<br>DRB1*0401-<br>DQA1*0301-<br>DQB1*0301 | 17    | 0.0207            | 5                      | 5        | 2.34%<br>(4.67%)  | 10                  | 10       | 3.73%<br>(7.46%)   | 2                       | 2        | 0.83%<br>(1.65%) | 0                    | 0        | 0.0% (0.0%)       |
| A*2902-<br>B*4403-<br>DRB1*0701-<br>DQA1*0201-<br>DQB1*0201 | 17    | 0.0207            | 4                      | 4        | 1.87%<br>(3.74%)  | 2                   | 2        | 0.75%<br>(1.49%)   | 8                       | 7        | 3.31%<br>(5.79%) | 3                    | 3        | 3.13%<br>(6.25%)  |
| A*0201-<br>B*5701-<br>DRB1*0701-                            | 8     | 0.0098            | 2                      | 2        | 0.93%<br>(1.87%)  | 5                   | 5        | 1.87%<br>(3.73%)   | 0                       | 0        | 0.0% (0.0%)      | 1                    | 1        | 1.04%<br>(2.08%)  |

|                                                                                        |   |        |   |   |                  |   |   |                  |   |   |                  |   |   |                  |
|----------------------------------------------------------------------------------------|---|--------|---|---|------------------|---|---|------------------|---|---|------------------|---|---|------------------|
| DQA1*0201-<br>DQB1*0303<br>A*2501-<br>B*1801-<br>DRB1*1501-<br>DQA1*0102-<br>DQB1*0602 | 8 | 0.0098 | 2 | 2 | 0.93%<br>(1.87%) | 5 | 5 | 1.87%<br>(3.73%) | 0 | 0 | 0.0% (0.0%)      | 1 | 1 | 1.04%<br>(2.08%) |
| A*0101-<br>B*5701-<br>DRB1*0701-<br>DQA1*0201-<br>DQB1*0303                            | 7 | 0.0085 | 3 | 3 | 1.4% (2.8%)      | 1 | 1 | 0.37%<br>(0.75%) | 2 | 2 | 0.83%<br>(1.65%) | 1 | 1 | 1.04%<br>(2.08%) |
| A*3201-<br>B*1401-<br>DRB1*0701-<br>DQA1*0201-<br>DQB1*0201                            | 7 | 0.0085 | 3 | 3 | 1.4% (2.8%)      | 0 | 0 | 0.0% (0.0%)      | 3 | 3 | 1.24%<br>(2.48%) | 1 | 1 | 1.04%<br>(2.08%) |
| A*0101-<br>B*0702-<br>DRB1*1501-<br>DQA1*0102-<br>DQB1*0602                            | 6 | 0.0073 | 1 | 1 | 0.47%<br>(0.93%) | 5 | 5 | 1.87%<br>(3.73%) | 0 | 0 | 0.0% (0.0%)      | 0 | 0 | 0.0% (0.0%)      |
| A*0201-<br>B*4001-<br>DRB1*1302-<br>DQA1*0102-<br>DQB1*0604                            | 6 | 0.0073 | 1 | 1 | 0.47%<br>(0.93%) | 5 | 5 | 1.87%<br>(3.73%) | 0 | 0 | 0.0% (0.0%)      | 0 | 0 | 0.0% (0.0%)      |
| A*1101-<br>B*2705-<br>DRB1*0101-<br>DQA1*0101-<br>DQB1*0501                            | 6 | 0.0073 | 4 | 4 | 1.87%<br>(3.74%) | 0 | 0 | 0.0% (0.0%)      | 2 | 2 | 0.83%<br>(1.65%) | 0 | 0 | 0.0% (0.0%)      |
| A*2301-<br>B*4403-<br>DRB1*0701-<br>DQA1*0201-<br>DQB1*0201                            | 6 | 0.0073 | 3 | 3 | 1.4% (2.8%)      | 1 | 1 | 0.37%<br>(0.75%) | 2 | 2 | 0.83%<br>(1.65%) | 0 | 0 | 0.0% (0.0%)      |
| A*3301-<br>B*1402-<br>DRB1*0102-                                                       | 6 | 0.0073 | 0 | 0 | 0.0% (0.0%)      | 0 | 0 | 0.0% (0.0%)      | 6 | 6 | 2.48%<br>(4.96%) | 0 | 0 | 0.0% (0.0%)      |



|                                                                                        |   |        |   |   |                  |   |   |                  |   |   |                  |   |   |                  |
|----------------------------------------------------------------------------------------|---|--------|---|---|------------------|---|---|------------------|---|---|------------------|---|---|------------------|
| DQA1*0101-<br>DQB1*0501<br>A*0101-<br>B*0801-<br>DRB1*0101-<br>DQA1*0101-<br>DQB1*0501 | 5 | 0.0061 | 3 | 3 | 1.4% (2.8%)      | 2 | 2 | 0.75%<br>(1.49%) | 0 | 0 | 0.0% (0.0%)      | 0 | 0 | 0.0% (0.0%)      |
| A*0201-<br>B*0801-<br>DRB1*0301-<br>DQA1*0501-<br>DQB1*0201                            | 5 | 0.0061 | 0 | 0 | 0.0% (0.0%)      | 4 | 4 | 1.49%<br>(2.99%) | 1 | 1 | 0.41%<br>(0.83%) | 0 | 0 | 0.0% (0.0%)      |
| A*0201-<br>B*1501-<br>DRB1*0101-<br>DQA1*0101-<br>DQB1*0501                            | 5 | 0.0061 | 0 | 0 | 0.0% (0.0%)      | 4 | 4 | 1.49%<br>(2.99%) | 0 | 0 | 0.0% (0.0%)      | 1 | 1 | 1.04%<br>(2.08%) |
| A*0201-<br>B*4001-<br>DRB1*0404-<br>DQA1*0301-<br>DQB1*0302                            | 5 | 0.0061 | 3 | 3 | 1.4% (2.8%)      | 2 | 2 | 0.75%<br>(1.49%) | 0 | 0 | 0.0% (0.0%)      | 0 | 0 | 0.0% (0.0%)      |
| A*0201-<br>B*4402-<br>DRB1*1301-<br>DQA1*0103-<br>DQB1*0603                            | 5 | 0.0061 | 1 | 1 | 0.47%<br>(0.93%) | 2 | 2 | 0.75%<br>(1.49%) | 1 | 1 | 0.41%<br>(0.83%) | 1 | 1 | 1.04%<br>(2.08%) |
| A*0201-<br>B*4403-<br>DRB1*0701-<br>DQA1*0201-<br>DQB1*0201                            | 5 | 0.0061 | 1 | 1 | 0.47%<br>(0.93%) | 2 | 2 | 0.75%<br>(1.49%) | 2 | 2 | 0.83%<br>(1.65%) | 0 | 0 | 0.0% (0.0%)      |
| A*2402-<br>B*3502-<br>DRB1*1104-<br>DQA1*0501-<br>DQB1*0301                            | 5 | 0.0061 | 0 | 0 | 0.0% (0.0%)      | 1 | 1 | 0.37%<br>(0.75%) | 2 | 2 | 0.83%<br>(1.65%) | 2 | 2 | 2.08%<br>(4.17%) |
| A*2902-<br>B*4403-<br>DRB1*1501-                                                       | 5 | 0.0061 | 0 | 0 | 0.0% (0.0%)      | 2 | 2 | 0.75%<br>(1.49%) | 0 | 0 | 0.0% (0.0%)      | 3 | 3 | 3.13%<br>(6.25%) |

|                                                                                                 |     |             |     |   |             |     |   |                  |     |   |                  |    |   |                  |
|-------------------------------------------------------------------------------------------------|-----|-------------|-----|---|-------------|-----|---|------------------|-----|---|------------------|----|---|------------------|
| DQA1*0102-<br>DQB1*0602<br>A*3002-<br>B*1801-<br>DRB1*0301-<br>DQA1*0501-<br>DQB1*0201<br>Other | 5   | 0.0061      | 0   | 0 | 0.0% (0.0%) | 1   | 1 | 0.37%<br>(0.75%) | 2   | 2 | 0.83%<br>(1.65%) | 2  | 2 | 2.08%<br>(4.17%) |
|                                                                                                 | 572 | 0.697560976 | 149 |   | 0.696261682 | 158 |   | 0.589552239      | 195 |   | 0.805785124      | 70 |   | 0.729166667      |

**Table S5. The relationship between phenotypes and the genotypes of top hits.**

| Clinical characteristics | SNP or HLA allele | Nw-EU | Spanish | Overall | Notes                                                                    |
|--------------------------|-------------------|-------|---------|---------|--------------------------------------------------------------------------|
| Bilirubin (log(umol/L))  | rs9274407/Minor   | 0.83  | 0.63    | 0.70    |                                                                          |
|                          | rs2523822/C       | 0.57  | 0.14    | 0.77    |                                                                          |
|                          | <i>DQB1*0602</i>  | 0.92  | 0.55    | 0.82    |                                                                          |
|                          | <i>DQB1*0402</i>  | 0.75  | 0.72    | 0.94    |                                                                          |
|                          | <i>B*1801</i>     | 0.092 | 0.56    | 0.11    |                                                                          |
|                          | <i>B*1801</i>     | 0.30  | 0.31    | 0.27    | hepatocellular cases only                                                |
| Age                      | rs9274407/Minor   | 0.92  | 0.9     | 0.84    |                                                                          |
|                          | rs2523822/C       | 0.43  | 0.32    | 0.93    |                                                                          |
|                          | <i>DQB1*0602</i>  | 0.83  | 0.61    | 0.62    |                                                                          |
|                          | <i>DQB1*0402</i>  | 0.56  | 0.26    | 0.31    |                                                                          |
|                          | <i>B*1801</i>     | 0.88  | 0.38    | 0.36    |                                                                          |
| ALT (log(U/L))           | rs9274407/Minor   | 0.46  | 0.87    | 0.42    |                                                                          |
|                          | rs2523822/C       | 0.94  | 0.96    | 0.90    |                                                                          |
|                          | <i>DQB1*0602</i>  | 0.57  | 0.52    | 0.39    |                                                                          |
|                          | <i>DQB1*0402</i>  | 0.62  | 0.24    | 0.36    |                                                                          |
|                          | <i>B*1801</i>     | 0.87  | 0.0056  | 0.029   | ALT is positively correlated with <i>B*1801</i> alleles in Spanish cases |
| ALP (log(U/L))           | rs9274407/Minor   | 0.050 | 0.43    | 0.049   | ALP is negatively correlated with rs9274407/Minor                        |
|                          | rs2523822/C       | 0.71  | 0.89    | 0.63    |                                                                          |
|                          | <i>DQB1*0602</i>  | 0.45  | 0.34    | 0.81    |                                                                          |
|                          | <i>DQB1*0402</i>  | 0.050 | 0.43    | 0.049   |                                                                          |
|                          | <i>B*1801</i>     | 0.15  | 0.8     | 0.15    |                                                                          |

Each cell shows the p-value from linear regression.

**Table S6. Test characteristics based on selected alleles comparing carriers to non-carriers and assuming the probability of AC-DILI to be 0.014%**

| Allele(s)                          |             | nw-EU  | Spanish |
|------------------------------------|-------------|--------|---------|
| rs9274407/Minor                    | specificity | 73.53% | 84.38%  |
|                                    | sensitivity | 58.40% | 36.96%  |
|                                    | PPV         | 0.03%  | 0.03%   |
|                                    | 1 - NPV     | 0.008% | 0.01%   |
| rs2523822/C                        | specificity | 51.63% | 51.25%  |
|                                    | sensitivity | 74.40% | 73.91%  |
|                                    | PPV         | 0.02%  | 0.02%   |
|                                    | 1 - NPV     | 0.007% | 0.007%  |
| rs9274407/Minor and rs2523822/C    | specificity | 88.24% | 92.50%  |
|                                    | sensitivity | 47.20% | 28.26%  |
|                                    | PPV         | 0.06%  | 0.05%   |
|                                    | 1 - NPV     | 0.008% | 0.01%   |
| <i>DQB1*0602</i>                   | specificity | 79.44% | 91.07%  |
|                                    | sensitivity | 51.56% | 40.43%  |
|                                    | PPV         | 0.03%  | 0.06%   |
|                                    | 1 - NPV     | 0.008% | 0.009%  |
| <i>A*0201</i>                      | specificity | 59.81% | 56.25%  |
|                                    | sensitivity | 74.22% | 59.57%  |
|                                    | PPV         | 0.03%  | 0.02%   |
|                                    | 1 - NPV     | 0.006% | 0.01%   |
| <i>A*0201</i> and <i>DQB1*0602</i> | specificity | 94.39% | 95.54%  |
|                                    | sensitivity | 41.41% | 25.53%  |
|                                    | PPV         | 0.1%   | 0.08%   |
|                                    | 1 - NPV     | 0.009% | 0.01%   |
| <i>B*1801</i>                      | specificity | N/C    | 90.18%  |
|                                    | sensitivity | N/C    | 27.66%  |
|                                    | PPV         | N/C    | 0.04%   |
|                                    | 1 - NPV     | N/C    | 0.01%   |
| <i>B*1801</i> and <i>DQB1*0602</i> | specificity | N/C    | 99.11%  |
|                                    | sensitivity | N/C    | 8.51%   |
|                                    | PPV         | N/C    | 0.13%   |
|                                    | 1 - NPV     | N/C    | 0.01%   |
